# Supplementary material for: A novel poly(2-mercaptobenzothiazole) coated magnetic nanoadsorbent derived from ZIF-8 for preconcentration/determination of palladium and silver
Source: Royal Society of Chemistry journal article supplement (doi:10.1039/d2ra06193g), 2022-01-01
Supplement: d2ra06193g1.pdf [file d2ra06193g1.pdf]

1       **A novel poly (2-mercaptobenzothiazole) coated magnetic nanoadsorbent derived from**  
2                   **ZIF-8 for preconcentration/determination of palladium and silver**

3                   Fatemeh Mohseni<sup>1</sup>, Mahboobeh Manoochehri <sup>1,\*</sup>, Faramarz Afshar Taromi<sup>2</sup>

4                   <sup>1</sup> *Department of Chemistry, Central Tehran Branch, Islamic Azad University, 1467686831, Tehran,*  
5                                                           *Iran*

6                   <sup>2</sup> *Department of Polymer Engineering and Color Technology, Amirkabir University of Technology,*  
7                                                           *424 Hafez Avenue, P.O. Box: 15875-4413, Tehran, Iran*

8

9

10

11

12

13

14

15

16 **Short title: Synthesis and application of a novel magnetic nanoadsorbent**

17

18 \* Corresponding author. Tel.: +98 9127242698 Fax: +98 2188385798

19 E-mail address: dr.manoochehri@yahoo.com (Mahboobeh Manoochehri)

20**Table S1**

21The proposed model for the adsorption optimization.

**Sequential Model Sum of Squares [Type I]**

| Source                  | Sum of Squares | df       | Mean Square   | F Value      | p-value Prob > F   |                  |
|-------------------------|----------------|----------|---------------|--------------|--------------------|------------------|
| Mean vs Total           | 1.329E+005     | 1        | 1.329E+005    |              |                    |                  |
| Linear vs Mean          | 539.71         | 3        | 179.90        | 1.08         | 0.3857             |                  |
| 2FI vs Linear           | 12.13          | 3        | 4.04          | 0.020        | 0.9960             |                  |
| <u>Quadratic vs 2FI</u> | <u>2509.69</u> | <u>3</u> | <u>836.56</u> | <u>58.27</u> | <u>&lt; 0.0001</u> | <u>Suggested</u> |
| Cubic vs Quadratic      | 30.40          | 4        | 7.60          | 0.40         | 0.8009             | Aliased          |
| Residual                | 113.16         | 6        | 18.86         |              |                    |                  |
| Total                   | 1.361E+005     | 20       | 6803.32       |              |                    |                  |

"Sequential Model Sum of Squares [Type I]": Select the highest order polynomial where the additional terms are significant and the model is not aliased.

**Lack of Fit Tests**

| Source           | Sum of Squares | df       | Mean Square  | F Value     | p-value Prob > F |                  |
|------------------|----------------|----------|--------------|-------------|------------------|------------------|
| Linear           | 2628.53        | 11       | 238.96       | 32.42       | 0.0006           |                  |
| 2FI              | 2616.39        | 8        | 327.05       | 44.37       | 0.0003           |                  |
| <u>Quadratic</u> | <u>106.71</u>  | <u>5</u> | <u>21.34</u> | <u>2.90</u> | <u>0.1341</u>    | <u>Suggested</u> |

22  
23  
24  
25  
26  
27  
28  
29  
30  
31  
32  
33  
34

35 **Table S2**

36 ANOVA results for the adsorption optimization.

**ANOVA for Response Surface Quadratic Model**

**Analysis of variance table [Partial sum of squares - Type III]**

| <b>Source</b>        | <b>Sum of Squares</b> | <b>df</b> | <b>Mean Square</b> | <b>F Value</b> | <b>p-value Prob &gt; F</b> |                 |
|----------------------|-----------------------|-----------|--------------------|----------------|----------------------------|-----------------|
| Model                | 3061.53               | 9         | 340.17             | 23.70          | < 0.0001                   | significant     |
| <i>A-pH</i>          | 251.56                | 1         | 251.56             | 17.52          | 0.0019                     |                 |
| <i>B-Sorbent a</i>   | 172.11                | 1         | 172.11             | 11.99          | 0.0061                     |                 |
| <i>C-Uptake tir</i>  | 116.04                | 1         | 116.04             | 8.08           | 0.0175                     |                 |
| <i>AB</i>            | 9.24                  | 1         | 9.24               | 0.64           | 0.4409                     |                 |
| <i>AC</i>            | 2.64                  | 1         | 2.64               | 0.18           | 0.6769                     |                 |
| <i>BC</i>            | 0.24                  | 1         | 0.24               | 0.017          | 0.8987                     |                 |
| <i>A<sup>2</sup></i> | 1742.44               | 1         | 1742.44            | 121.37         | < 0.0001                   |                 |
| <i>B<sup>2</sup></i> | 875.92                | 1         | 875.92             | 61.01          | < 0.0001                   |                 |
| <i>C<sup>2</sup></i> | 288.31                | 1         | 288.31             | 20.08          | 0.0012                     |                 |
| Residual             | 143.56                | 10        | 14.36              |                |                            |                 |
| <i>Lack of Fit</i>   | 106.71                | 5         | 21.34              | 2.90           | 0.1341                     | not significant |
| <i>Pure Error</i>    | 36.85                 | 5         | 7.37               |                |                            |                 |
| Cor Total            | 3205.09               | 19        |                    |                |                            |                 |

- 37
- 38
- 39
- 40
- 41
- 42
- 43
- 44
- 45
- 46
- 47
- 48
- 49
- 50
- 51
- 52
- 53
- 54
- 55

56 **Table S3**

57 ANOVA results for the desorption optimization.

**Analysis of variance table [Partial sum of squares - Type III]**

| Source               | Sum of Squares | df | Mean Square | F Value    | p-value Prob > F |                 |
|----------------------|----------------|----|-------------|------------|------------------|-----------------|
| Model                | 5225.85        | 14 | 373.28      | 13.70      | < 0.0001         | significant     |
| <i>A-Time (min)</i>  | 1627.27        | 1  | 1627.27     | 59.72      | < 0.0001         |                 |
| <i>B-Eluent volu</i> | 192.67         | 1  | 192.67      | 7.07       | 0.0179           |                 |
| <i>C-Conc. of Ti</i> | 49.12          | 1  | 49.12       | 1.80       | 0.1994           |                 |
| <i>D-Conc. of H</i>  | 1465.71        | 1  | 1465.71     | 53.79      | < 0.0001         |                 |
| <i>AB</i>            | 0.25           | 1  | 0.25        | 9.175E-003 | 0.9250           |                 |
| <i>AC</i>            | 0.37           | 1  | 0.37        | 0.014      | 0.9084           |                 |
| <i>AD</i>            | 8.03           | 1  | 8.03        | 0.29       | 0.5952           |                 |
| <i>BC</i>            | 0.11           | 1  | 0.11        | 4.078E-003 | 0.9499           |                 |
| <i>BD</i>            | 9.68           | 1  | 9.68        | 0.36       | 0.5601           |                 |
| <i>CD</i>            | 4.00           | 1  | 4.00        | 0.15       | 0.7070           |                 |
| <i>A<sup>2</sup></i> | 129.54         | 1  | 129.54      | 4.75       | 0.0456           |                 |
| <i>B<sup>2</sup></i> | 569.81         | 1  | 569.81      | 20.91      | 0.0004           |                 |
| <i>C<sup>2</sup></i> | 1478.78        | 1  | 1478.78     | 54.27      | < 0.0001         |                 |
| <i>D<sup>2</sup></i> | 187.34         | 1  | 187.34      | 6.88       | 0.0192           |                 |
| Residual             | 408.72         | 15 | 27.25       |            |                  |                 |
| <i>Lack of Fit</i>   | 324.00         | 10 | 32.40       | 1.91       | 0.2457           | not significant |
| <i>Pure Error</i>    | 84.71          | 5  | 16.94       |            |                  |                 |
| Cor Total            | 5634.57        | 29 |             |            |                  |                 |

58  
59  
60  
61  
62  
63  
64  
65  
66  
67

68 **Fig. S1:** FT-IR spectrum of (a) MZIF-8, and (b) MPC@PMBT nano-adsorbents.

69 **(a)**

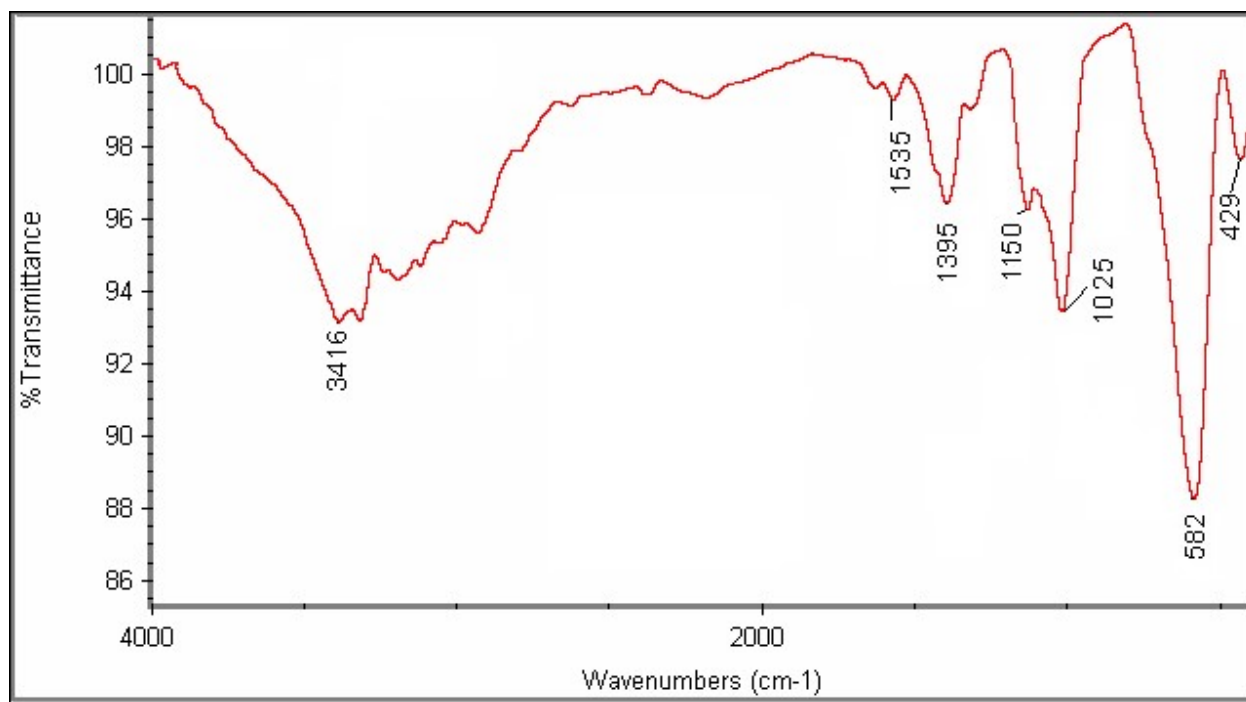

71 **(b)**

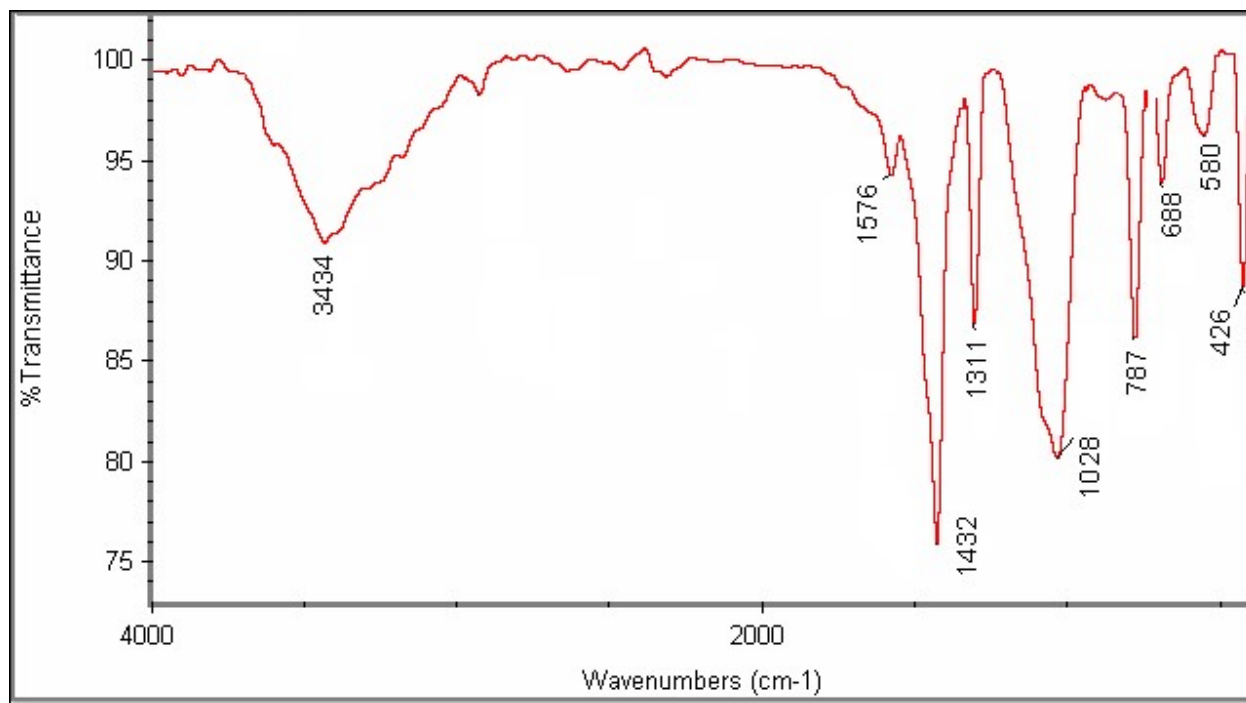

74 **Fig. S2:** Reusability study of the MPC@PMBT nanomaterial.

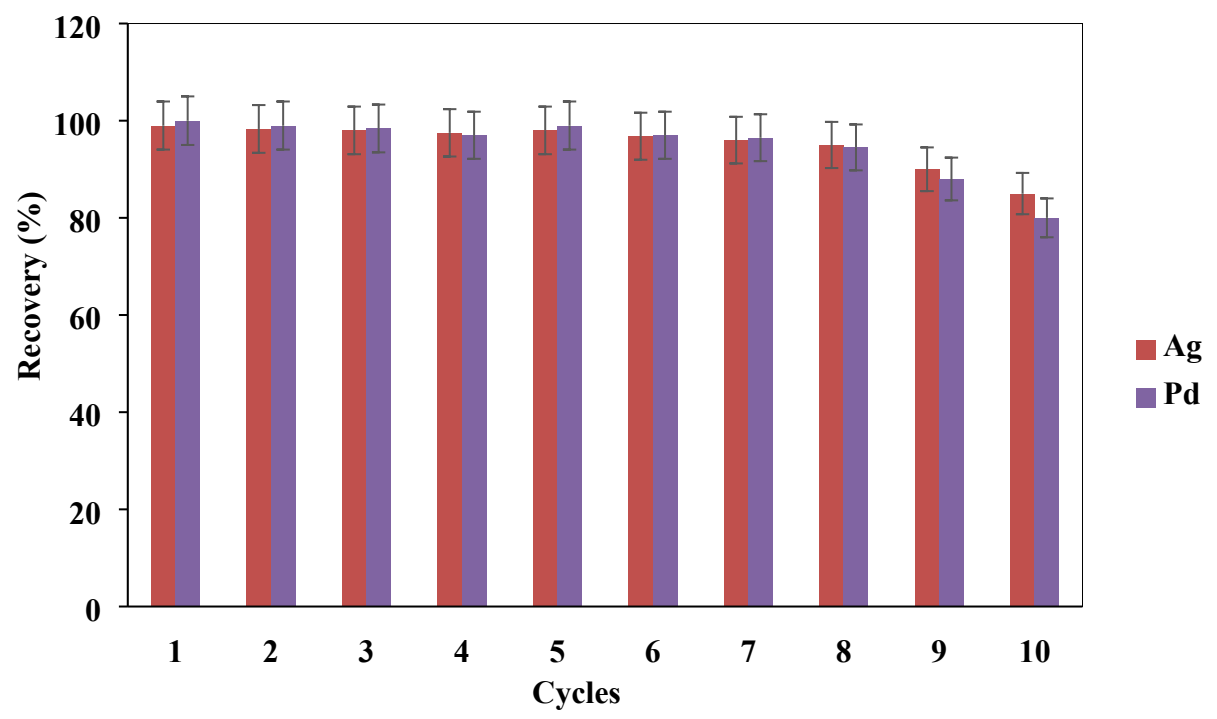

75  
76  
77  
78  
79  
80  
81  
82  
83  
84  
85  
86  
87  
88

89 **Fig. S3:** Effect of sample volume.

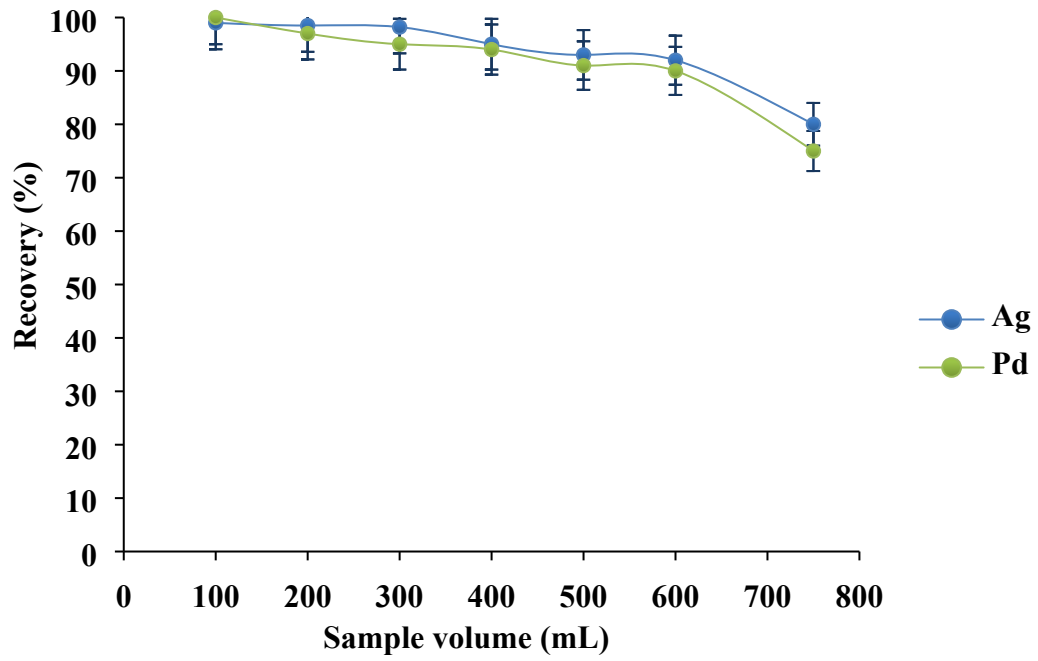

90

91

92

93

94

95

96

97

98

99

100

101

102

103

104 **Fig. S4:** The calibration plots of Ag and Pd without performing the preconcentration process.

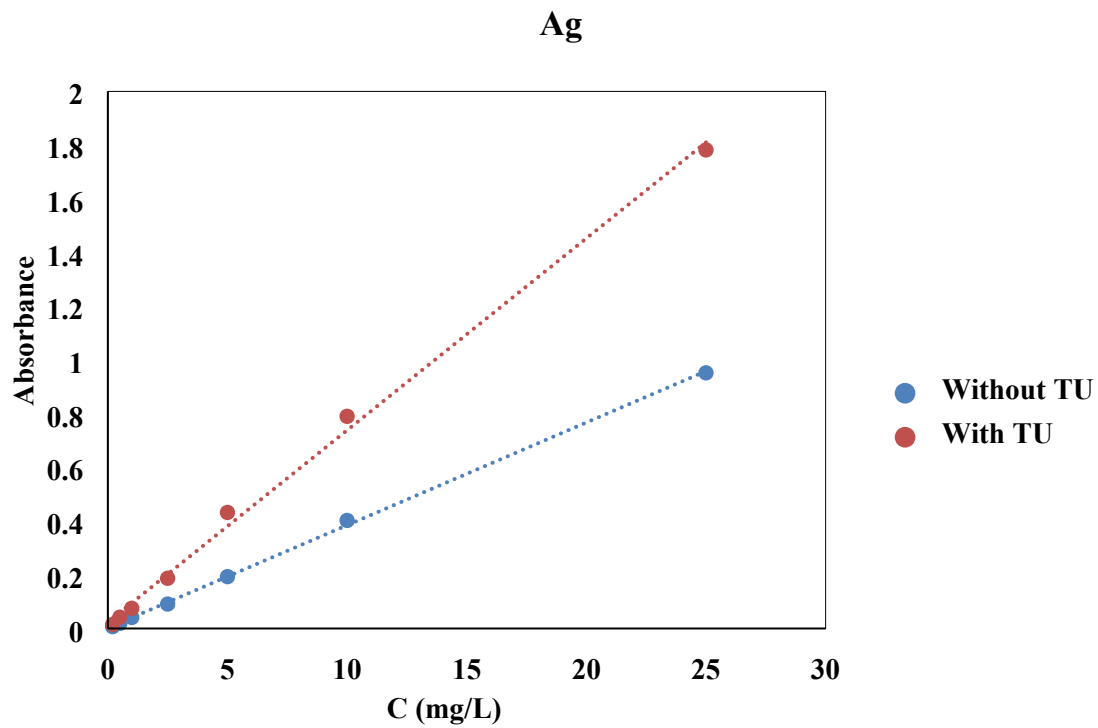

105

106

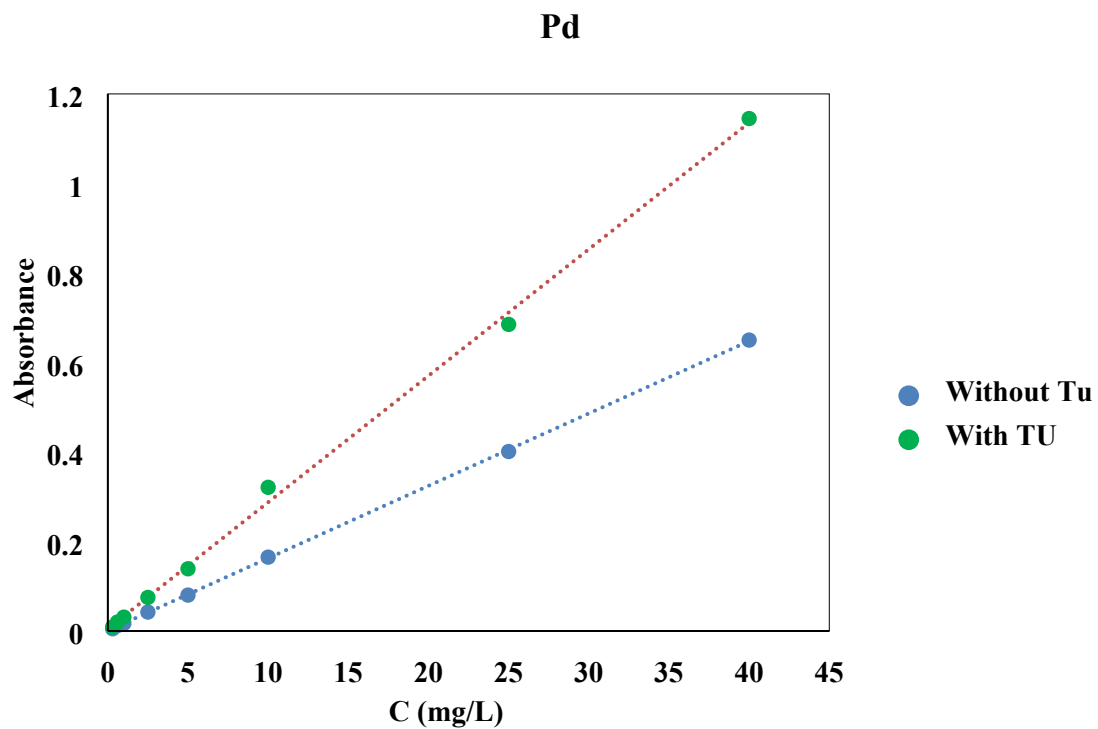

107
